# Supplementary material for: Fast tracking of adulterants and bacterial contamination in food via Raman and infrared spectroscopies: paving the way for a healthy and safe world
Source: Royal Society of Chemistry journal article supplement (doi:10.1039/d1sd00046b), 2022-01-01
Supplement: d1sd00046b1.pdf [file d1sd00046b1.pdf]

## Supporting information

### **Fast Tracking of Adulterants and Bacterial Contamination in Food via Raman and Infrared Spectroscopies: Paving the Way for a Healthy and Safe World**

Raj Kumar Sen<sup>1,2</sup>, K. Karthikeyan<sup>3</sup>, Priyanka Prabhakar<sup>1,2</sup>, Jeet Vishwakarma<sup>1,2</sup>, Gaurav Gupta<sup>1,2</sup>, S. N. Mishra<sup>1,2</sup>, Alka Mishra<sup>1,2</sup>, J. P. Chaurasia<sup>1,2</sup>, S. A. R. Hashmi<sup>1,2</sup>, D. P. Mondal<sup>1,2</sup>, Pratima R. Solanki<sup>4</sup>, A. K. Srivastava<sup>1,2</sup>, Chetna Dhand<sup>1,2,\*</sup>, Neeraj Dwivedi<sup>1,2,\*</sup>

<sup>1</sup> CSIR-Advanced Materials and Processes Research Institute, Bhopal-462026, India

<sup>2</sup>Academy of Scientific and Innovative Research (AcSIR), Ghaziabad-201002, India

<sup>3</sup>Kongunadu Arts and Science College (KASC), Coimbatore, Tamilnadu-641029, India

<sup>4</sup>Special Centre for Nanoscience, Jawaharlal Nehru University, New Delhi-110067, India

#### **\*Corresponding Authors**

**\*Email:** [neeraj.dwivedi@ampri.res.in](mailto:neeraj.dwivedi@ampri.res.in) and [neerajdwivedi6@gmail.com](mailto:neerajdwivedi6@gmail.com) (N. Dwivedi)

**\*Email:** [chetna.dhand@ampri.res.in](mailto:chetna.dhand@ampri.res.in) and [chetnachem24@gmail.com](mailto:chetnachem24@gmail.com) (C. Dhand)

## **1. Role of SPR in Detection of Adulterants and Bacterial Contamination in Food**

Surface plasmon resonance (SPR) is an optical phenomenon that can be used to monitor the binding of molecules without the need for labels.<sup>1</sup>, kinetics, and affinity of molecular interactions.<sup>2,3,4</sup> SPR determines the binding of two proteins, a protein, and an antibody, DNA and a protein, etc. As a label-free technique, SPR does not require additional reagents or laborious sample preparation.<sup>5, 6</sup> In the SPR technique, the signal is generated from the interaction of incident light and a metal nanoparticle layer (such as gold) by producing surface waves. The metal layer is applied normally on a piece of a prism-based on the Kretschmann model.<sup>7</sup> The incident light's angle is regulated by a rotating stage, and reflection from the prism is detected. When the surface wave is generated at a given angle, the reflected light is greatly dampened due to the energy transfer process.<sup>8</sup> The signal drop that corresponds to the refractive index of the target material on the metal nanoparticle layer may be used to examine the characteristics (Figure 1). The SPR signal is very sensitive to changes in the metal layers' refractive index.<sup>9</sup> SPR does not affect the material composition and can be used for examining natural liquids such as honey.<sup>10</sup>

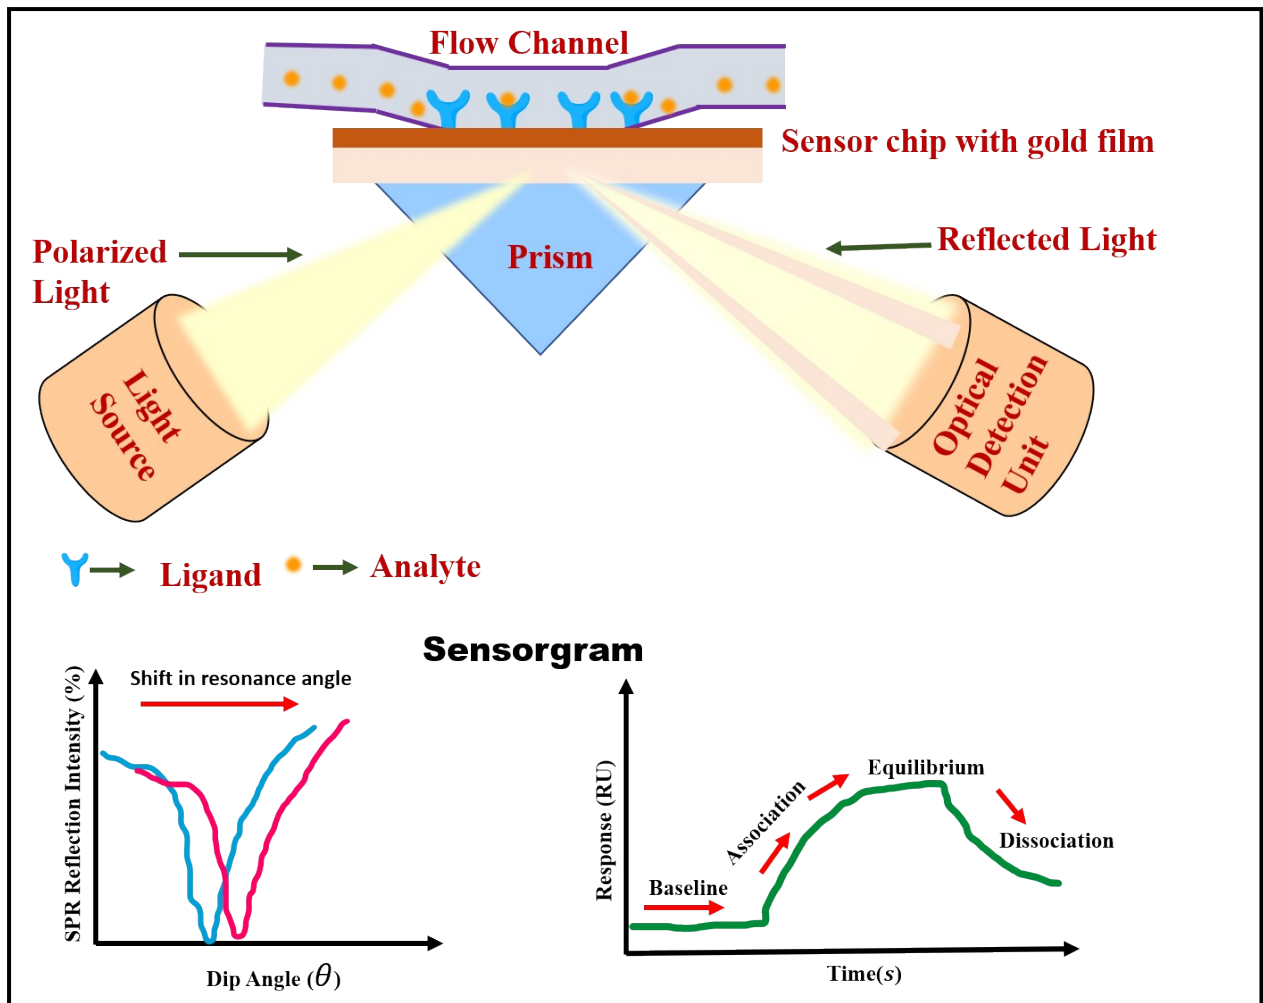

**Fig. 1.** Schematic illustration of surface plasmon resonance.

The wave vector of an evanescent field ( $K_{ev}$ ) and the wave vector of a surface plasmon ( $K_{sp}$ ) is used to describe the propagation in SPR, equations (1) and (2).<sup>11</sup>

$$K_{ev} = \frac{\nu_0}{C} n_g \sin \theta \quad (1)$$

where  $\nu_0$  is the frequency of incident light,  $n_g$  is the refractive index of the dense medium (glass),  $\theta$  is the angle of incident light and  $C$  is the speed of light in a vacuum<sup>12</sup>, and

$$K_{sp} = \frac{v_o}{C} \sqrt{\frac{\epsilon_m n_s^2}{\epsilon_m + n_s^2}} \quad (2)$$

where  $n_s$  is the refractive index of the dielectric medium and  $\epsilon_m$  is the permittivity of the metallic film. When  $K_{sp}=K_{ev}$ , surface plasmons become resonantly excited, thus causing this phenomenon to happen.<sup>13</sup>

Zainuddin et al.<sup>13</sup> used the SPR technique to identify the adulteration of pure honey. They found that with increasing adulterant concentration the change in resonance angle rises linearly. Pure honey showed a higher refractive index than contaminated honey. For fructose, sucrose, and glucose adulterants, the sensitivity of the sensor was excellent. Lu et al. developed an immunosensor based on the surface plasmon resonance for detecting melamine in milk products and pet foods.<sup>14</sup> Mazumdar et al. developed a quick and simple SPR-based immunoassay for detecting Salmonella in milk. Salmonellosis is a severe health hazard and one of the most common causes of food poisoning.<sup>15</sup> SPR test was able to identify *S. Typhimurium* down to a concentration of  $1.25 \times 10^5$  cells ml<sup>-1</sup>. Yadav et al. developed silver (Ag) and Ag- graphene oxide (GO) coated fiber optics sensors for detecting adulteration in pure honey following SPR phenomena.<sup>16</sup>

## References

1. D. G. Drescher, N. A. Ramakrishnan and M. J. Drescher, *Methods Mol Biol*, 2009, **493**, 323-343.
2. H. H. Nguyen, J. Park, S. Kang and M. Kim, *Sensors (Basel, Switzerland)*, 2015, **15**, 10481-10510.
3. A. M. Shrivastav, U. Cvelbar and I. Abdulhalim, *Communications Biology*, 2021, **4**, 70.
4. Y. Tang, X. Zeng and J. Liang, *Journal of Chemical Education*, 2010, **87**, 742-746.
5. R. Bakhtiar, *Journal of Chemical Education*, 2013, **90**, 203-209.
6. K. R. Srivastava, S. Awasthi, P. Mishra and P. Srivastava, 2020, DOI: 10.1016/B978-0-12-818783-8.00013-X, pp. 237-277.
7. Y. W. Fen and W. M. Mat Yunus, *Sensor Review*, 2013, **33**.
8. S. Shen, T. Liu and J. Guo, *Appl. Opt.*, 1998, **37**, 1747-1751.
9. C. S. Schneider, A. G. Bhargav, J. G. Perez, A. S. Wadajkar, J. A. Winkles, G. F. Woodworth and A. J. Kim, *Journal of Controlled Release*, 2015, **219**, 331-344.
10. K. V. Gobi, H. Iwasaka and N. Miura, *Biosens Bioelectron*, 2007, **22**, 1382-1389.
11. R. J. Green, R. A. Frazier, K. M. Shakesheff, M. C. Davies, C. J. Roberts and S. J. Tendler, *Biomaterials*, 2000, **21**, 1823-1835.
12. Y. W. Fen, W. M. Mat Yunus and Z. Talib, *Optik - International Journal for Light and Electron Optics*, 2013, **124**, 126-133.
13. N. Zainuddin, Y. W. Fen, A. Alwahib, M. Yaacob, N. Bidin and M. A. Mahdi, *Optik*, 2018, **168**.
14. Y. Lu, Y. Xia, M. Pan, X. Wang and S. Wang, *Journal of Agricultural and Food Chemistry*, 2014, **62**, 12471-12476.
15. S. D. Mazumdar, M. Hartmann, P. Kämpfer and M. Keusgen, *Biosens Bioelectron*, 2007, **22**, 2040-2046.
16. V. Yadav, M. Yadav, P. Kumar and R. K. Verma, *Food Chemistry*, 2020, **332**, 127346.
